# Supplementary material for: Small lightning flashes from shallow electrical storms on Jupiter
Source: Springer Nature journal article supplement (doi:10.1038/s41586-020-2532-1), 2020-08-05
Supplement: MOESM6 [file 41586_2020_2532_MOESM6_ESM.xlsx]

## Sheet: panel a
0.00101937	0.00509684	0.0122324	0.00815494	0.00203874
0.00509684	0.0377166	0.0978593	0.0489297	0.0132518
0.00917431	0.09684	0.301733	0.0978593	0.0224261
0.00509684	0.038736	0.0998981	0.049949	0.0142712
0.00101937	0.00611621	0.0132518	0.00917431	0.0030581

## Sheet: panel b
wavelength (nm)	Throughput (QExT)
450	0
460	0.00870618
470	0.0307985
480	0.0602378
490	0.0909847
500	0.117
510	0.13936
520	0.16214
530	0.1838
540	0.2028
550	0.2176
560	0.229857
570	0.241496
580	0.251376
590	0.258358
600	0.2613
610	0.261793
620	0.262183
630	0.262468
640	0.262641
650	0.2627
660	0.262485
670	0.261907
680	0.261067
690	0.260064
700	0.259
710	0.257647
720	0.255838
730	0.253767
740	0.251624
750	0.2496
760	0.247875
770	0.24632
780	0.244669
790	0.242651
800	0.24
810	0.235368
820	0.228274
830	0.219745
840	0.210811
850	0.2025
860	0.19505
870	0.187775
880	0.180315
890	0.17231
900	0.1634
910	0.153148
920	0.141613
930	0.129185
940	0.116251
950	0.1032
960	0.0884223
970	0.0716272
980	0.055181
990	0.0414499
1000	0.0328
1010	0.028214
1020	0.0247708
1030	0.0219805
1040	0.0193535
1050	0.0164
1060	0.01312
1070	0.00984
1080	0.00656
1090	0.00328
1100	0
